# Supplementary material for: Are Experts Well-Calibrated? An Equivalence-Based Hypothesis Test
Source: MDPI journal article supplement (doi:10.3390/e24060757), 2022-05-27
Supplement: s1 [file s1]

# Wellek's equivalence test

We use the notation, formulations, and the details about the exact version of the equivalence test of a single binomial proportion presented in Wellek (chapter 4 in [13]). Some of the material will simply be repeated (rather than just referred to) for the sake of completeness.

The binomial distribution can be considered as a sum  $T = \sum_{i=1}^n X_i$  of  $n$  mutually independent Bernoulli random variables;  $X_1, X_2, \dots, X_n$ , with two outcomes, say *success* and *failure* with probability  $p$  and  $1-p$ , respectively. The probability mass function of the distribution of  $T$  is:

$$f(T = t; n, p) = \binom{n}{t} p^t (1-p)^{n-t}, t \in \{0, 1, 2, \dots, n\}. \quad (1)$$

Suppose that an unknown population proportion of success  $P$  is required to be statistically tested for equivalence with a reference value  $P_r$ . The statistic of interest in defining the equivalence test of a single binomial proportion is the number of successes  $T$  out of a certain  $n$  number of Bernoulli trials. Let us assume that equivalence can be claimed if  $P$  remains between  $P_1 = P_r - \epsilon_1$  and  $P_2 = P_r + \epsilon_2$ , where an acceptable margin of deviation around the reference value is allowed in the test.  $P_1$  and  $P_2$  can be made symmetric around  $P_r$  by taking  $\epsilon_1 = \epsilon_2 = \epsilon$ , unless specific, different values are preferred for  $\epsilon_1$  and  $\epsilon_2$ , which will be context dependent.

An equivalence test includes two null hypotheses and a single alternative hypothesis, from which equivalence can only be claimed by rejecting both null hypotheses. Furthermore, allowing an acceptable margin of deviation  $\epsilon$  around the reference value  $P_r$  leads to a claim of equivalence if  $P$  remains between  $P_1 = P_r - \epsilon$  and  $P_2 = P_r + \epsilon$ . Therefore, the alternative hypothesis is defined as  $P_1 < P < P_2$  and the two null hypotheses should be defined as  $0 < P \leq P_1$  and  $P_2 \leq P < 1$ . Formally:

$$\begin{aligned} H_0 : & 0 < P \leq P_1 \text{ or } P_2 \leq P < 1 \\ H_1 : & P_1 < P < P_2, \text{ where } (0 < P_1 < P_2 < 1). \end{aligned}$$

The following set of rules define a uniformly most powerful level  $\alpha$  test that can be defined by the following set of rules:

1. Rejection of  $H_0$  for  $C_\alpha^1 < T < C_\alpha^2$
2. Rejection with probability  $\gamma_\alpha^1$  for  $T = C_\alpha^1$

3. Rejection with probability  $\gamma_\alpha^2$  for  $T = C_\alpha^2$
4. Acceptance for  $T < C_\alpha^1$  (or  $T > C_\alpha^2$ )

It is worth mentioning that all constants  $C_1, C_2, \gamma_1$ , and  $\gamma_2$  depend on the values of  $n, P_1, P_2$ . The following equations (eq. 2), together with the probability mass function  $f(T = t; n, P)$  of the binomial random variable  $T$  (eq. 1), and an iterative algorithm can be used to derive these constants.

$$\begin{aligned} \sum_{t=C_1+1}^{C_2-1} f(T = t; n, P_1) + \sum_{\nu=1}^2 \gamma_\nu f(T = C_\nu; n, P_1) &= \alpha \\ \sum_{t=C_1+1}^{C_2-1} f(T = t; n, P_2) + \sum_{\nu=1}^2 \gamma_\nu f(T = C_\nu; n, P_2) &= \alpha; \\ 0 \leq C_1 \leq C_2 \leq n, \quad 0 \leq \gamma_1, \gamma_2 < 1. \end{aligned} \tag{2}$$

The iterative algorithm necessary to derive a solution for  $C_1, C_2, \gamma_1$ , and  $\gamma_2$  is as follows **chapter 4** in [13].

1. Select an initial value  $C_1^0$  for the lower bound of the rejection region knowing that it is greater or equal to the correct value  $C_1$ .
2. Keeping  $C_1^0$  fixed, find the largest integer  $C_2^0 > C_1^0$  such that the probability of observing  $T$  to take on its value in the closed interval  $[C_1^0 + 1, C_2^0 - 1]$  does not exceed  $\alpha$ , neither for  $P = P_1$  nor for  $P = P_2$ .
3. Consider equation 2 as a system of linear equations in the two unknowns  $\gamma_1$  and  $\gamma_2$  and compute its solution  $\gamma_1^0, \gamma_2^0$ .
4. Test whether the condition  $0 \leq \gamma_1^0, \gamma_2^0 < 1$  is satisfied. If so, a solution of the full system in equation 2 is found and can be given as  $(C_1, C_2, \gamma_1, \gamma_2) = (C_1^0, C_2^0, \gamma_1^0, \gamma_2^0)$ . If not, reduce  $C_1^0$  by 1 and repeat steps (2) and (3).

The inclusion of the  $\gamma_1$  and  $\gamma_2$  rejection probabilities at the border values  $T = C_1$  and  $T = C_2$  in the equation 2 implies that the above discussed level  $\alpha$  test of the equivalence test is defined as a randomized test. The equivalence-based hypothesis testing procedure can be implemented to test the calibration of a given expert at a certain intended level of coverage probability as follows:

1. Consider the intended level of coverage probability as the reference value  $P_r$ .
2. Define  $P_1 = P_r - \epsilon$  and  $P_2 = P_r + \epsilon$  based on a fixed, chosen value of  $\epsilon$ .
3. Compute the limits of the rejection region  $C_1$  and  $C_2$  at a given number of elicited intervals ( $n$ ).

4. Observe the number of intervals containing true values ( $x$ ) as a random variable for the expert.
5. If  $x < C_1$  OR  $x > C_2$ , then do not reject the null hypotheses.
6. If  $x > C_1$  AND  $x < C_2$ , then reject the null hypotheses and conclude the equivalence indicting that the expert is well-calibrated at the intended coverage probability  $P_r$ .
7. If  $x = C_1$ , then generate a uniform random number  $u$ . If  $u < \gamma_1$ , then reject the null hypotheses and conclude the equivalence. Otherwise do not reject the null hypotheses.
8. If  $x = C_2$ , then generate a uniform random number  $u$ . If  $u < \gamma_2$ , then reject the null hypotheses and conclude the equivalence. Otherwise do not reject the null hypotheses.

**Note:** When  $x = C_1$  or  $x = C_2$  the test is inconclusive. In such a situation, a uniform distributed random number  $u$  should be generated and compared with  $\gamma_1$  or  $\gamma_2$  appropriately to make a conclusion.

## References

- [13] Stefan Wellek. *Testing statistical hypotheses of equivalence and noninferiority*. Chapman and Hall/CRC, 2010.
