# Supplementary material for: Are Experts Well-Calibrated? An Equivalence-Based Hypothesis Test
Source: MDPI journal article supplement (doi:10.3390/e24060757), 2022-05-27
Supplement: s1 [file s1]

## Wellek's R program

```
bi1st <- function(alpha,n,P1,P2)      {

K <- trunc(n/2)
indiP1K <- 0
indiS6 <- 0

if (2*K >= n && P2 == (1-P1))
{ P1K <- pbinom(K,n,P1) - pbinom(K-1,n,P1)
  if (P1K >= alpha)
  { C1 <- K
    C2 <- K
    gam1 <- alpha/P1K
    gam2 <- gam1
    POWNONRD <- 0
    POK <- pbinom(K,n,.5) - pbinom(K-1,n,.5)
    POW <- gam1 * POK
    indiP1K <- 1  } }

if (indiP1K != 1)
{
P0 <- (P1+P2) / 2
K1 <- max(trunc(n*P1),1)
K2 <- max(trunc(n*P0)-2,K1-1)

repeat
{
FBINP1C1 <- pbinom(K1-1,n,P1)
alpha1 <- 0
FBINP2C1 <- pbinom(K1-1,n,P2)
alpha2 <- 0

while(max(alpha1,alpha2) <= alpha)
{  alpha1 <- pbinom(K2,n,P1) - FBINP1C1
   alpha2 <- pbinom(K2,n,P2) - FBINP2C1
   K2 <- K2 + 1  }
}
```

```

K2 <- K2 - 2
if(K2 < K1)
{ INCL <- 1
  INCR <- 1 } else

{ K1 <- K1 + 1
  INCL <- 0
  INCR <- 1 }

repeat
{
alpha1 <- pbinom(K2,n,P1) - pbinom(K1-1,n,P1)
alpha2 <- pbinom(K2,n,P2) - pbinom(K1-1,n,P2)
delalph1 <- alpha - alpha1
delalph2 <- alpha - alpha2
b11 <- pbinom(K1-1,n,P1) - pbinom(max(K1-2,0),n,P1) * sign(1+sign(K1-2))
b12 <- pbinom(K2+1,n,P1) - pbinom(K2,n,P1)
b21 <- pbinom(K1-1,n,P2) - pbinom(max(K1-2,0),n,P2) * sign(1+sign(K1-2))
b22 <- pbinom(K2+1,n,P2) - pbinom(K2,n,P2)

gam1 <- (b22*delalph1 - b12*delalph2) / (b11*b22 - b12*b21)
gam2 <- (b11*delalph2 - b21*delalph1) / (b11*b22 - b12*b21)

if ((min(gam1,gam2)<0 || max(gam1,gam2) >= 1) && INCL == 0 && INCR == 1)
{ K1 <- K1 - 1
  K2 <- K2 - 1
  INCL <- 1
  INCR <- 0 } else

if ((min(gam1,gam2)<0 || max(gam1,gam2) >= 1) && INCL == 1 && INCR == 0)
{ K2 <- K2 +1
  INCL <- 1
  INCR <- 1 } else

if ((min(gam1,gam2)<0 || max(gam1,gam2) >= 1) && INCL == 1 && INCR == 1)
{ K1 <- K1 +1
  break    } else

{ indiS6 <- 1
  break    } }

if (indiS6 == 1)
  break    }

```

```

C1 <- K1 - 1
C2 <- K2 + 1
fbinpoc1 <- pbinom(C1,n,P0)
B01 <- fbinpoc1 - pbinom(max(C1-1,0),n,P0) * sign(1+sign(C1-1))
fbinpok2 <- pbinom(K2,n,P0)
B02 <- pbinom(C2,n,P0) - fbinpok2
POWNONRD <- fbinpok2 - fbinpoc1
POW <- gam1*B01 + POWNONRD + gam2*B02
if (C1 == C2) POW <- POW/2
}

cat(" alpha =",alpha," n =",n," P1 =",P1," P2 =",P2," C1 =",C1,
    " C2 =",C2,"\n","gam1 =",gam1," gam2 =",gam2," POWNONRD =",POWNONRD,
    " POW =",POW)
}

```

Try the EQUIVNONINF package in your browser  
[library\(EQUIVNONINF\)](#)

[help\(bilst\)](#)

Any scripts or data that you put into this service are public.

EQUIVNONINF documentation built on July 12, 2021, 5:08 p.m.

[R Package Documentation](#)

[rdr.io home](#)

[R language documentation](#)

[Run R code online](#)

[Browse R Packages](#)

[CRAN packages](#)

[Bioconductor packages](#)

[R-Forge packages](#)

[GitHub packages](#)

[We want your feedback!](#)

Note that we can't provide technical support on individual packages.

You should contact the package authors for that.

[Tweet to @rdrRHQ](#)

[GitHub issue tracker](#)

[ian@mutexlabs.com](mailto:ian@mutexlabs.com)

[Personal blog](#)
